# Supplementary material
Source: MDPI journal article supplement (https://www.mdpi.com/2073-4344/13/9/1232)
Supplement: s1 [file s1]

## Supplementary Materials

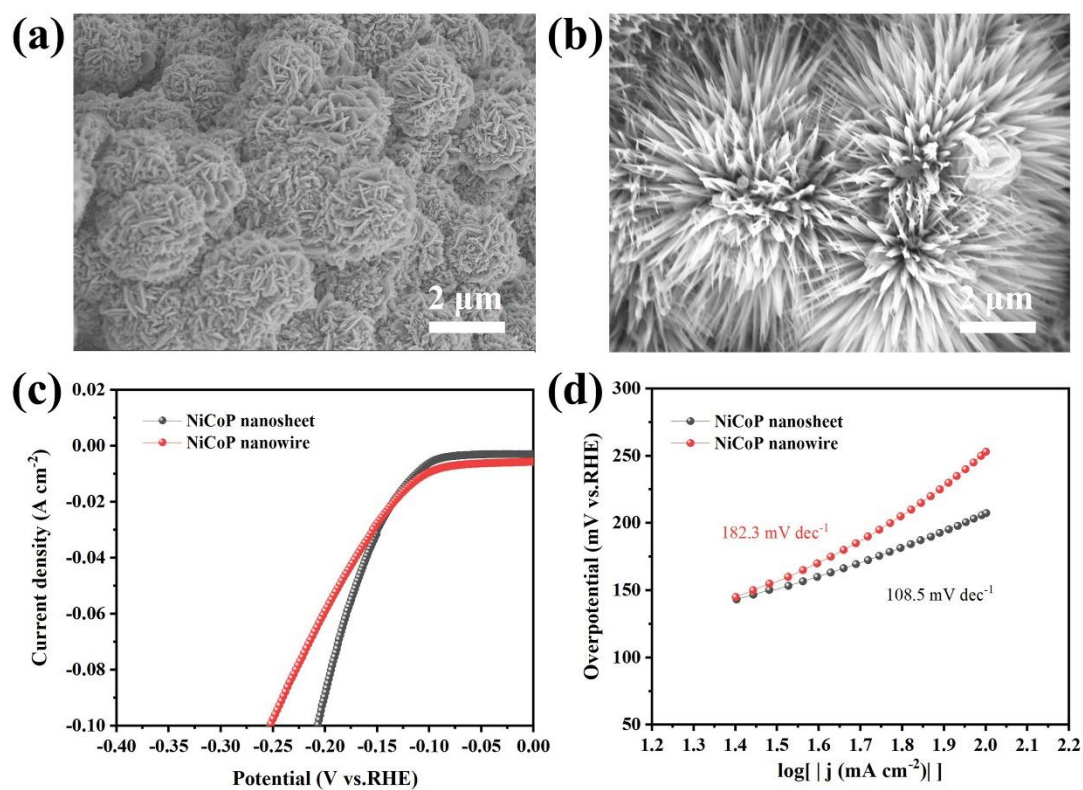

**Figure S1.** SEM images of a) NiCoP nanosheets and b) NiCoP nanowires. c) LSV curves and d) Tafel plots of NiCoP nanosheets and NiCoP nanowires.

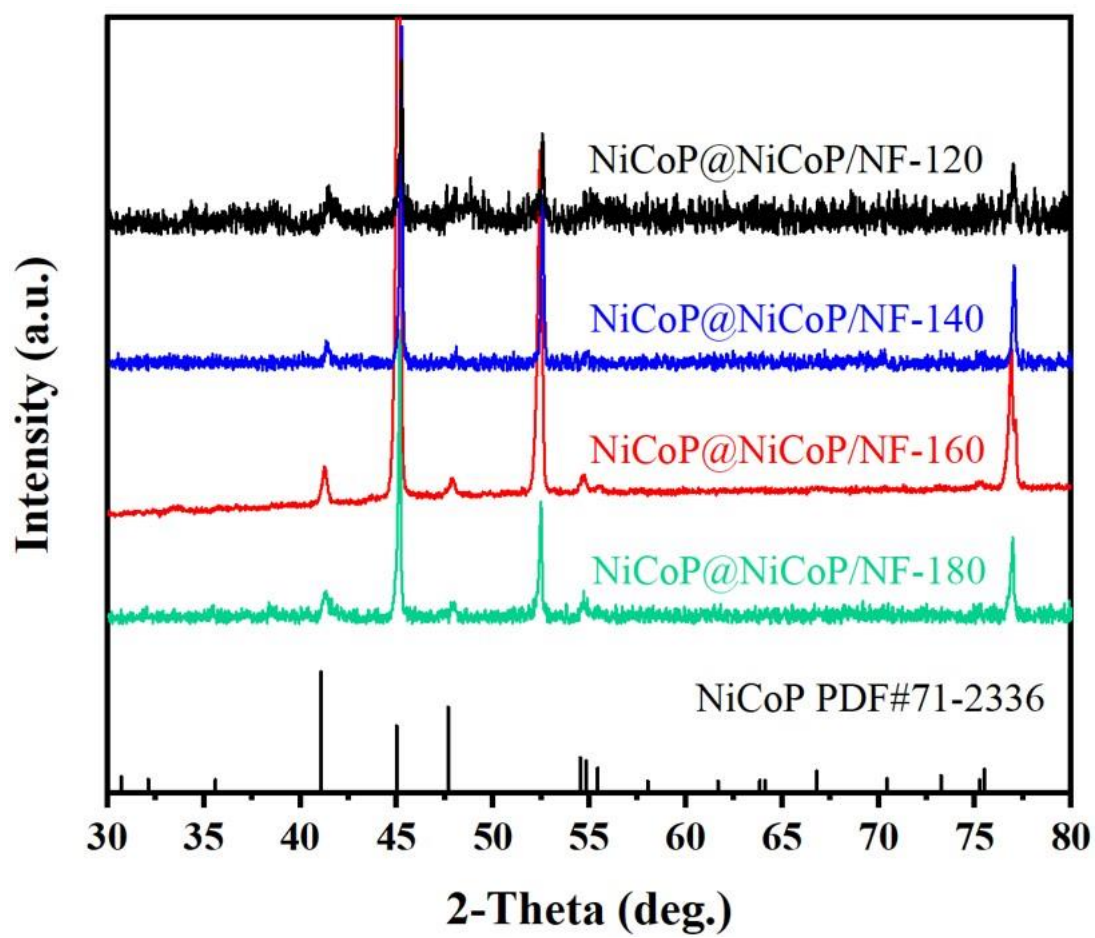

**Figure S2.** XRD spectra of NiCoP@NiCoP/NF-120, NiCoP@NiCoP/NF-140, NiCoP@NiCoP/NF-160 and NiCoP@NiCoP/NF-180.

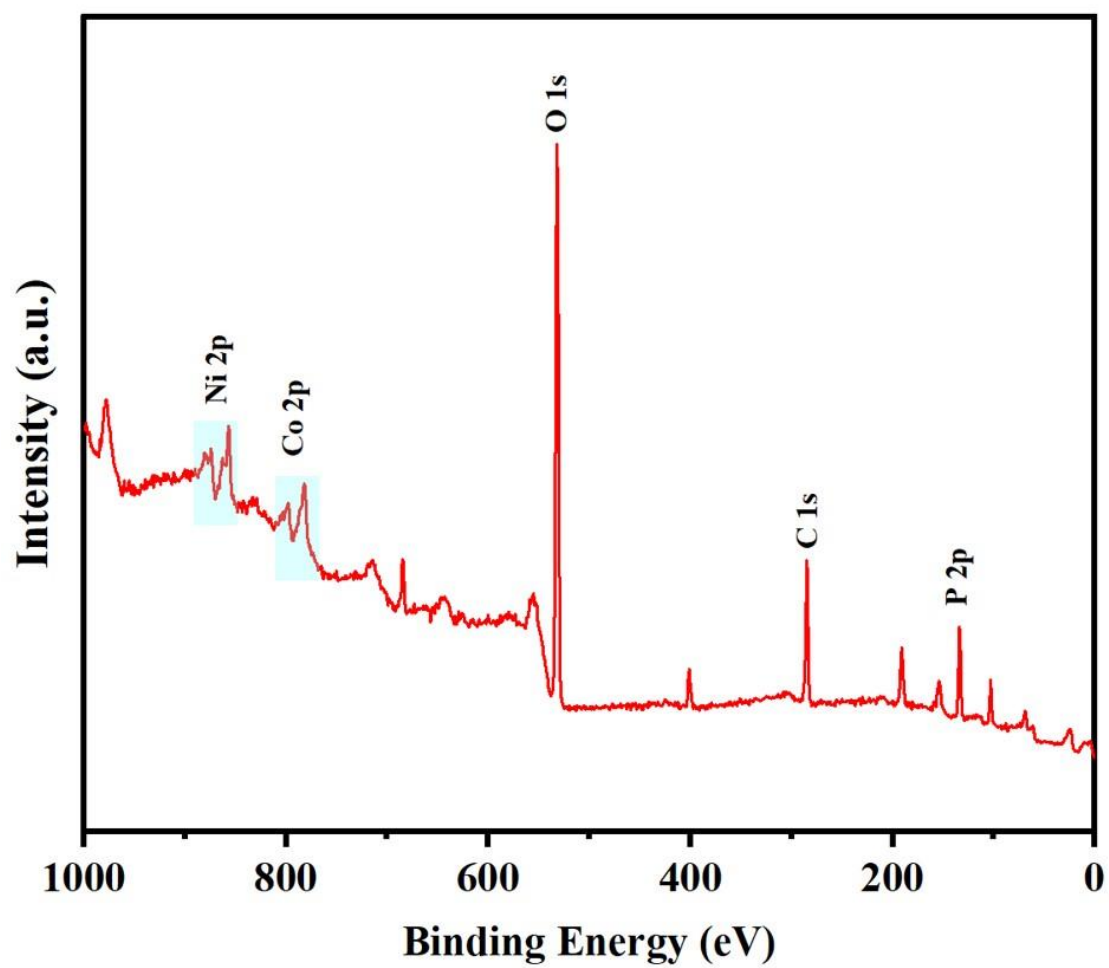

Figure S3. XPS survey spectra of NiCoP/NF.

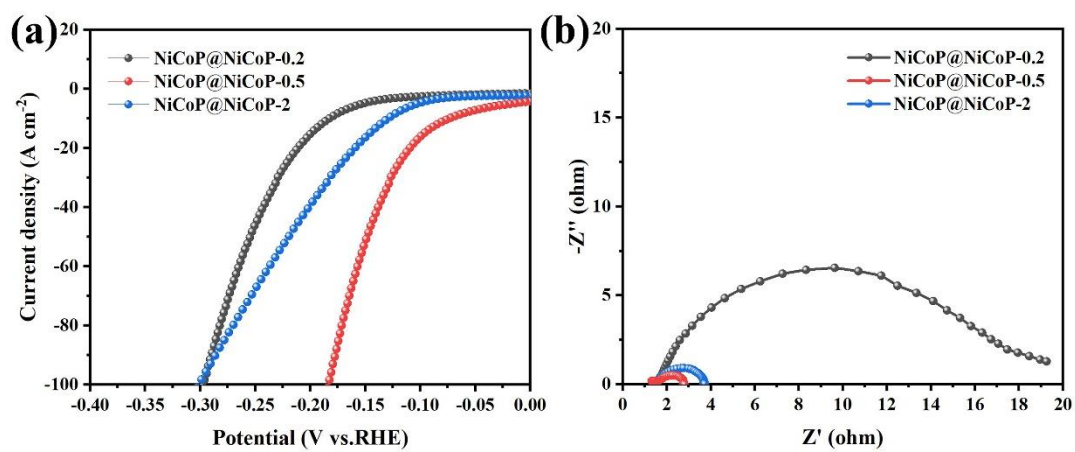

**Figure S4.** a) iR-corrected LSV polarization curves and b) EIS plot of NiCoP@NiCoP/NF-0.2, NiCoP@NiCoP/NF-0.5 and NiCoP@NiCoP/NF-2.

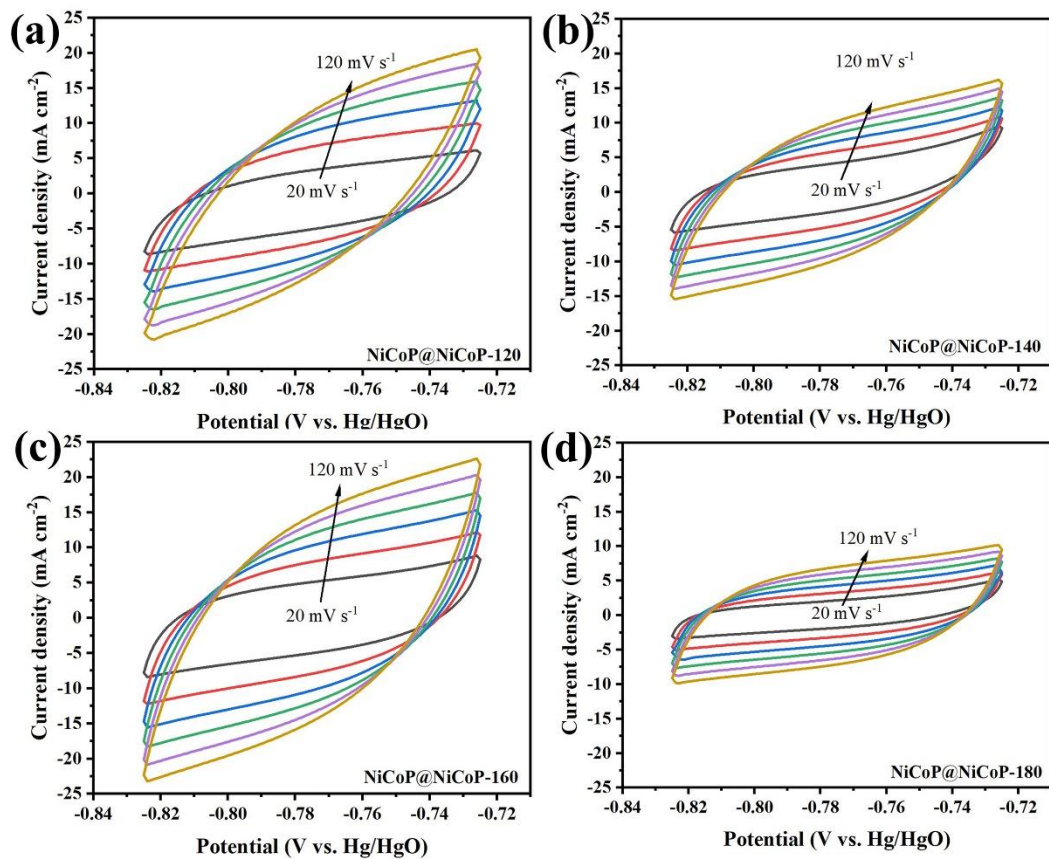

**Figure S5.** CV curves of a)  $\text{NiCoP@NiCoP/NF-120}$ , b)  $\text{NiCoP@NiCoP/NF-140}$ , c)  $\text{NiCoP@NiCoP/NF-160}$  and d)  $\text{NiCoP@NiCoP/NF-180}$ .

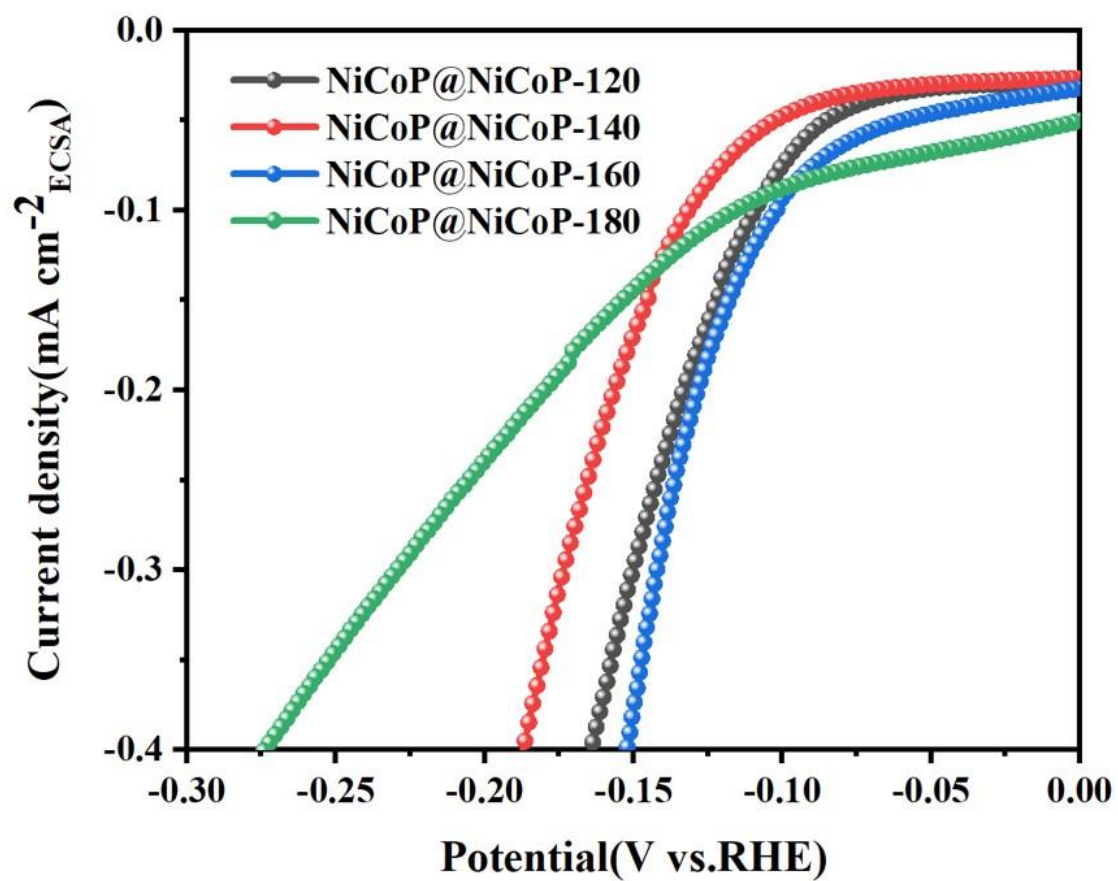

**Figure S6.** ECSA-normalized polarization curves of NiCoP@NiCoP/NF-120, NiCoP@NiCoP/NF-140, NiCoP@NiCoP/NF-160 and NiCoP@NiCoP/NF-180.

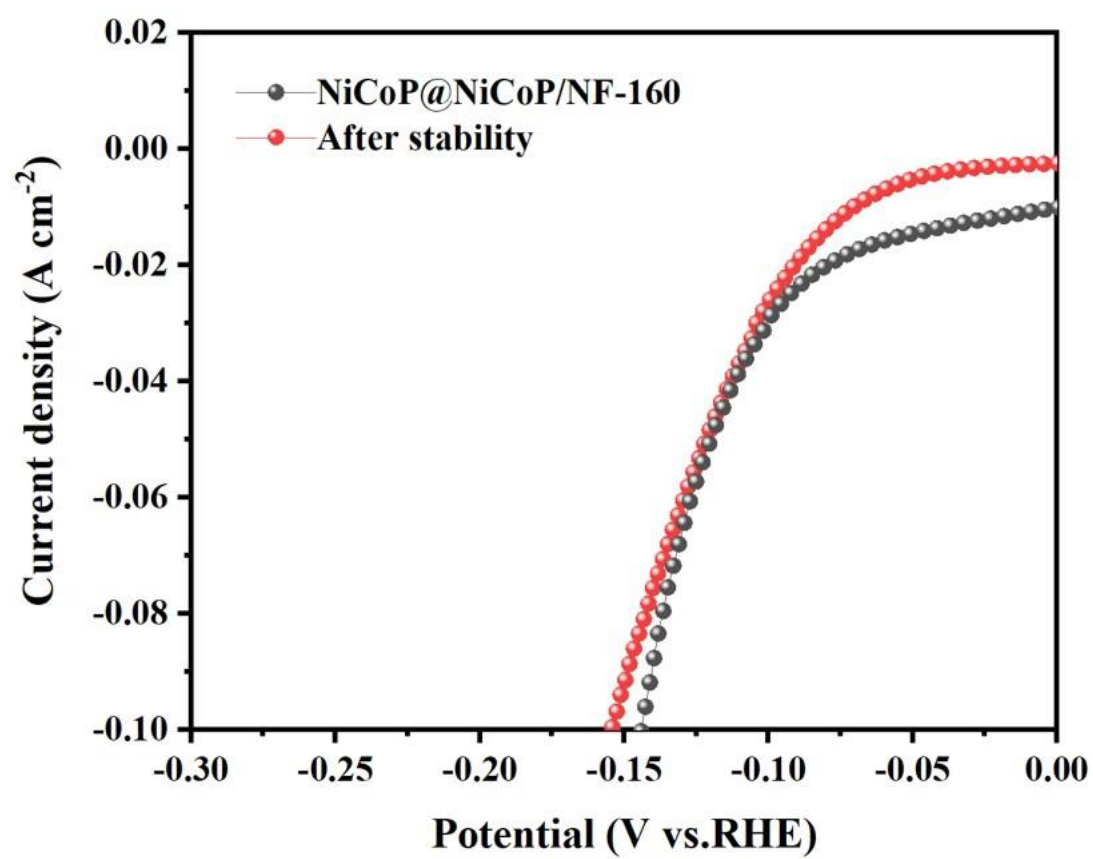

Figure S7. LSV curves of NiCoP@NiCoP/NF-160 before and after stability test.
